# Supplementary material for: LBX2-AS1 as a Novel Diagnostic Biomarker and Therapeutic Target Facilitates Multiple Myeloma Progression by Enhancing mRNA Stability of LBX2
Source: Front Mol Biosci. 2021 Sep 6;8:706570. doi: 10.3389/fmolb.2021.706570 (PMC8450339; doi:10.3389/fmolb.2021.706570)
Supplement: Supplementary file 1 [file DataSheet1.ZIP]

Archive with 49 entries (39 files):
- Original Source Data-Figure 1-4/
- Original Source Data-Figure 1-4/Figure 1/
- Original Source Data-Figure 1-4/Figure 1/Figure 1B.xlsx
- Original Source Data-Figure 1-4/Figure 1/Figure 1C.xlsx
- Original Source Data-Figure 1-4/Figure 1/Figure 1D.xlsx
- Original Source Data-Figure 1-4/Figure 1/Figure 1E.xlsx
- Original Source Data-Figure 1-4/Figure 1/Figure 1F.xlsx
- Original Source Data-Figure 1-4/Figure 2/
- Original Source Data-Figure 1-4/Figure 2/Figure 2A.xlsx
- Original Source Data-Figure 1-4/Figure 2/Figure 2B.xlsx
- Original Source Data-Figure 1-4/Figure 2/Figure 2C.xlsx
- Original Source Data-Figure 1-4/Figure 2/Figure 2D.xlsx
- Original Source Data-Figure 1-4/Figure 2/Figure 2E/
- Original Source Data-Figure 1-4/Figure 2/Figure 2E-G.xlsx
- Original Source Data-Figure 1-4/Figure 2/Figure 2E/shLBX2-NCI-H929.JPG
- Original Source Data-Figure 1-4/Figure 2/Figure 2E/shLBX2-U266.JPG
- Original Source Data-Figure 1-4/Figure 2/Figure 2E/shNC-NCI-H929.JPG
- Original Source Data-Figure 1-4/Figure 2/Figure 2E/shNC-U266.JPG
- Original Source Data-Figure 1-4/Figure 3/
- Original Source Data-Figure 1-4/Figure 3/Figure 3A/
- Original Source Data-Figure 1-4/Figure 3/Figure 3A/NCI-H929-shLBX2-AS1.pdf
- Original Source Data-Figure 1-4/Figure 3/Figure 3A/NCI-H929-shNC.pdf
- Original Source Data-Figure 1-4/Figure 3/Figure 3A/U266-shLBX2-AS1.pdf
- Original Source Data-Figure 1-4/Figure 3/Figure 3A/U266-shNC.pdf
- Original Source Data-Figure 1-4/Figure 3/Figure 3B.xlsx
- Original Source Data-Figure 1-4/Figure 3/Figure 3C.xlsx
- Original Source Data-Figure 1-4/Figure 3/Figure 3D/
- Original Source Data-Figure 1-4/Figure 3/Figure 3D/Bax-NCI-H929.tif
- Original Source Data-Figure 1-4/Figure 3/Figure 3D/Bax-U266.tif
- Original Source Data-Figure 1-4/Figure 3/Figure 3D/Bcl-2-NCI-H929.tif
- Original Source Data-Figure 1-4/Figure 3/Figure 3D/Bcl-2-U266.tif
- Original Source Data-Figure 1-4/Figure 3/Figure 3D/Cleaved caspase3-NCI-H929.tif
- Original Source Data-Figure 1-4/Figure 3/Figure 3D/Cleaved caspase3-U266.tif
- Original Source Data-Figure 1-4/Figure 3/Figure 3D/GAPDH-NCI-H929.tif
- Original Source Data-Figure 1-4/Figure 3/Figure 3D/GAPDH-U266.tif
- Original Source Data-Figure 1-4/Figure 3/Figure 3E-G.xlsx
- Original Source Data-Figure 1-4/Figure 3/Figure 3H-J.xlsx
- Original Source Data-Figure 1-4/Figure 4/
- Original Source Data-Figure 1-4/Figure 4/Figure 4A.xlsx
- Original Source Data-Figure 1-4/Figure 4/Figure 4B/
- Original Source Data-Figure 1-4/Figure 4/Figure 4B/GAPDH.tif
- Original Source Data-Figure 1-4/Figure 4/Figure 4B/LBX2.tif
- Original Source Data-Figure 1-4/Figure 4/Figure 4C.xlsx
- Original Source Data-Figure 1-4/Figure 4/Figure 4D.xlsx
- Original Source Data-Figure 1-4/Figure 4/Figure 4E.xlsx
- Original Source Data-Figure 1-4/Figure 4/Figure 4F/
- Original Source Data-Figure 1-4/Figure 4/Figure 4F/GAPDH.tif
- Original Source Data-Figure 1-4/Figure 4/Figure 4F/LBX2.tif
- Original Source Data-Figure 1-4/Figure 4/Figure 4G.xlsx
