# Supplementary material for: LBX2-AS1 as a Novel Diagnostic Biomarker and Therapeutic Target Facilitates Multiple Myeloma Progression by Enhancing mRNA Stability of LBX2
Source: Front Mol Biosci. 2021 Sep 6;8:706570. doi: 10.3389/fmolb.2021.706570 (PMC8450339; doi:10.3389/fmolb.2021.706570)
Supplement: Supplementary file 1 [file DataSheet1.ZIP › Original Source Data-Figure 1-4/Figure 1/Figure 1B.xlsx]

## Sheet: Sheet1
Healthy	MM
0.82	1.12
1.012	1.22
1.13	1.37
1.32	1.22
0.23	1.28
0.98	1.36
0.47	1.48
0.21	1.22
0.51	1.57
1.25	1.62
1.14	1.69
1.45	1.699
0.67	0.78
0.54	0.74
1.45	0.47
1.34	0.69
0.34	1.34
0.54	2.56
1.56	1.89
0.81	2.54
0.45	2.23
0.58	2.12
0.89	2.34
0.81	0.91
0.79	1.04
0.53	1.06
1.31	1.16
1.25	2.89
1.57	0.67
1.78	2.67
0.34	2.87
0.53	2.89
0.64	1.97
0.39	1.59
0.81	0.51
1.12	0.678
1.04	0.56
0.67	1.09
0.76	2.45
0.78	2.03
0.34	2.56
0.39	2.48
0.48	0.85
0.49	0.89
0.57	2.04
1.21	2.13
1.16	3.97
1.29	3.78
1.31	3.56
1.24	3.53
0.48	2.32
1.56	2.43
1.58	3.46
1.59	2.87
1.13	2.64
1.45	0.46
1.31	0.51
1.13	0.51
1.19	0.63
1.21	0.65
