# Supplementary material for: LBX2-AS1 as a Novel Diagnostic Biomarker and Therapeutic Target Facilitates Multiple Myeloma Progression by Enhancing mRNA Stability of LBX2
Source: Front Mol Biosci. 2021 Sep 6;8:706570. doi: 10.3389/fmolb.2021.706570 (PMC8450339; doi:10.3389/fmolb.2021.706570)
Supplement: Supplementary file 1 [file DataSheet1.ZIP › Original Source Data-Figure 1-4/Figure 1/Figure 1E.xlsx]

## Sheet: Sheet1
	Nucleus			Cytoplasm
	Mean	SD	N	Mean	SD	N
LBX2-AS1	0.41	0.048	3	0.59	0.053	3
18S	0.23	0.078	3	0.77	0.064	3
U6	0.78	0.056	3	0.22	0.089	3
