# Supplementary material for: LBX2-AS1 as a Novel Diagnostic Biomarker and Therapeutic Target Facilitates Multiple Myeloma Progression by Enhancing mRNA Stability of LBX2
Source: Front Mol Biosci. 2021 Sep 6;8:706570. doi: 10.3389/fmolb.2021.706570 (PMC8450339; doi:10.3389/fmolb.2021.706570)
Supplement: Supplementary file 1 [file DataSheet1.ZIP › Original Source Data-Figure 1-4/Figure 2/Figure 2A.xlsx]

## Sheet: Sheet1
shNC			shLBX2-AS1#1			shLBX2-AS1#2
Mean	SD	N	Mean	SD	N	Mean	SD	N
1.25	0.12	3	0.59	0.05	3	0.75	0.11	3
