# Supplementary material for: LBX2-AS1 as a Novel Diagnostic Biomarker and Therapeutic Target Facilitates Multiple Myeloma Progression by Enhancing mRNA Stability of LBX2
Source: Front Mol Biosci. 2021 Sep 6;8:706570. doi: 10.3389/fmolb.2021.706570 (PMC8450339; doi:10.3389/fmolb.2021.706570)
Supplement: Supplementary file 1 [file DataSheet1.ZIP › Original Source Data-Figure 1-4/Figure 2/Figure 2C.xlsx]

## Sheet: Sheet1
	shNC			shLBX2-AS1
	Mean	SD	N	Mean	SD	N
0 h	0.953625	0.044017	3	0.958478	0.079341	3
24 h	0.936319	0.016727	3	0.759495	0.154544	3
48 h	0.951114	0.105446	3	0.698324	0.059163	3
72 h	0.940917	0.063784	3	0.55002	0.058044	3
