# Supplementary material for: LBX2-AS1 as a Novel Diagnostic Biomarker and Therapeutic Target Facilitates Multiple Myeloma Progression by Enhancing mRNA Stability of LBX2
Source: Front Mol Biosci. 2021 Sep 6;8:706570. doi: 10.3389/fmolb.2021.706570 (PMC8450339; doi:10.3389/fmolb.2021.706570)
Supplement: Supplementary file 1 [file DataSheet1.ZIP › Original Source Data-Figure 1-4/Figure 2/Figure 2D.xlsx]

## Sheet: Sheet1
	shNC			shLBX2-AS1
	Mean	SD	N	Mean	SD	N
0 h	0.987773	0.0412658	3	0.97969	0.074382	3
24 h	0.971549	0.0156815	3	0.712027	0.144885	3
48 h	0.985419	0.0988554	3	0.654679	0.0554655	3
72 h	0.97586	0.0597978	3	0.515644	0.0544165	3
