# Supplementary material for: LBX2-AS1 as a Novel Diagnostic Biomarker and Therapeutic Target Facilitates Multiple Myeloma Progression by Enhancing mRNA Stability of LBX2
Source: Front Mol Biosci. 2021 Sep 6;8:706570. doi: 10.3389/fmolb.2021.706570 (PMC8450339; doi:10.3389/fmolb.2021.706570)
Supplement: Supplementary file 1 [file DataSheet1.ZIP › Original Source Data-Figure 1-4/Figure 2/Figure 2E-G.xlsx]

## Sheet: Sheet1
NCI-H929	shNC			shLBX2-AS1
	Mean	SD	N	Mean	SD	N
	179	15	3	116	13	3
U266	shNC			shLBX2-AS1
	Mean	SD	N	Mean	SD	N
	181	12	3	136	11	3
