# Supplementary material for: LBX2-AS1 as a Novel Diagnostic Biomarker and Therapeutic Target Facilitates Multiple Myeloma Progression by Enhancing mRNA Stability of LBX2
Source: Front Mol Biosci. 2021 Sep 6;8:706570. doi: 10.3389/fmolb.2021.706570 (PMC8450339; doi:10.3389/fmolb.2021.706570)
Supplement: Supplementary file 1 [file DataSheet1.ZIP › Original Source Data-Figure 1-4/Figure 3/Figure 3E-G.xlsx]

## Sheet: Sheet1
	shNC			shLBX2-AS1
	Mean	SD	N	Mean	SD	N
Bax	0.81	0.13	3	1.25	0.12	3
Bcl-2	1.32	0.09	3	0.77	0.07	3
Cleaved caspase3	0.65	0.06	3	1.33	0.09	3
