# Supplementary material for: LBX2-AS1 as a Novel Diagnostic Biomarker and Therapeutic Target Facilitates Multiple Myeloma Progression by Enhancing mRNA Stability of LBX2
Source: Front Mol Biosci. 2021 Sep 6;8:706570. doi: 10.3389/fmolb.2021.706570 (PMC8450339; doi:10.3389/fmolb.2021.706570)
Supplement: Supplementary file 1 [file DataSheet1.ZIP › Original Source Data-Figure 1-4/Figure 3/Figure 3H-J.xlsx]

## Sheet: Sheet1
	shNC			shLBX2-AS1
	Mean	SD	N	Mean	SD	N
Bax	0.45	0.05	3	1.33	0.1	3
Bcl-2	1.32	0.1	3	0.85	0.08	3
Cleaved caspase3	0.75	0.07	3	1.15	0.1	3
